# Supplementary material for: OTUD7B upregulation predicts a poor response to paclitaxel in patients with triple-negative breast cancer
Source: PubMed Central journal article supplement (PMC5787489; doi:10.18632/oncotarget.23074), 2017-12-09
Supplement: oncotarget-09-553-s001.pdf [file oncotarget-09-553-s001.pdf]

## **OTUD7B upregulation predicts a poor response to paclitaxel in patients with triple-negative breast cancer**

### **SUPPLEMENTARY MATERIALS**

**Supplementary Table 1: List of consensus genes with 1.5-fold changes in MDA-MB436 and HCC38 cells following treatment with paclitaxel. See Supplementary\_Table\_1**

**Supplementary Table 2: List of consensus upstream regulators that are computationally predicted to be activated or inhibited after paclitaxel treatment in MDA-MB436 and HCC38 cells**

| <b>MB436_Upstream Regulators</b> | <b>Activation z-score</b> | <b>p-value of overlap</b> | <b>HCC38_Upstream Regulators</b> | <b>Activation z-score</b> | <b>p-value of overlap</b> |
|----------------------------------|---------------------------|---------------------------|----------------------------------|---------------------------|---------------------------|
| CSF2                             | 2.186                     | 7.71E-08                  | CSF2                             | 3.725                     | 1.19E-09                  |
| let-7                            | 2.135                     | 4.45E-09                  | let-7                            | -2.618                    | 4.03E-06                  |
| lipopolysaccharide               | -2.311                    | 7.38E-04                  | lipopolysaccharide               | 2.537                     | 6.21E-07                  |
| LY294002                         | 2.052                     | 1.57E-07                  | LY294002                         | -2.816                    | 5.89E-07                  |
| MED1                             | 2.359                     | 1.78E-03                  | MED1                             | 2.554                     | 1.24E-04                  |
| PTGER2                           | 2.714                     | 3.98E-05                  | PTGER2                           | 5.496                     | 1.84E-21                  |
| S100A6                           | 2.449                     | 7.87E-03                  | S100A6                           | 2.121                     | 3.20E-04                  |
| SHH                              | -2.383                    | 1.05E-04                  | SHH                              | -2.072                    | 6.29E-02                  |
| STAT3                            | 2.375                     | 9.91E-08                  | STAT3                            | 2.747                     | 7.32E-08                  |
| TICAM1                           | -3.105                    | 1.30E-05                  | TICAM1                           | 2.191                     | 4.47E-02                  |
| tretinoin                        | -2.444                    | 7.06E-08                  | tretinoin                        | -2.255                    | 2.42E-05                  |

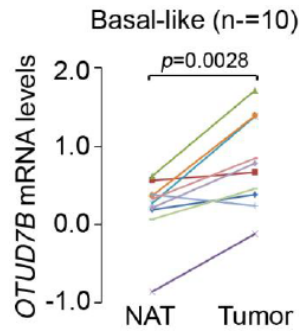

**Supplementary Figure 1: *OTUD7B* expression is upregulated in primary tumors compared to normal adjacent tissues derived from patients with basal-like breast cancer.** *OTUD7B* expression in paired normal adjacent tissues (NAT) and primary tumors derived from patients with BRCA was analyzed using TCGA database. The statistical difference was evaluated using paired *t*-tests.

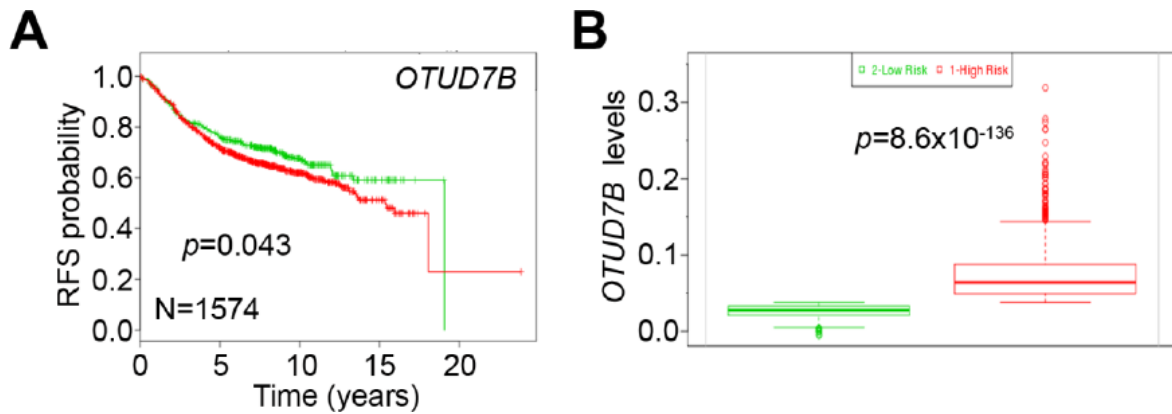

**Supplementary Figure 2: *OTUD7B* upregulation predicts a poor recurrence-free survival probability in breast cancer patients.** (A) Kaplan-Meier analysis of recurrence-free survival (RFS) probability according to *OTUD7B* expression in breast cancer patients, performed using the SurvExpress database. (B) Boxplot of *OTUD7B* mRNA levels in low (green) and high (red)-risk cohorts in A.

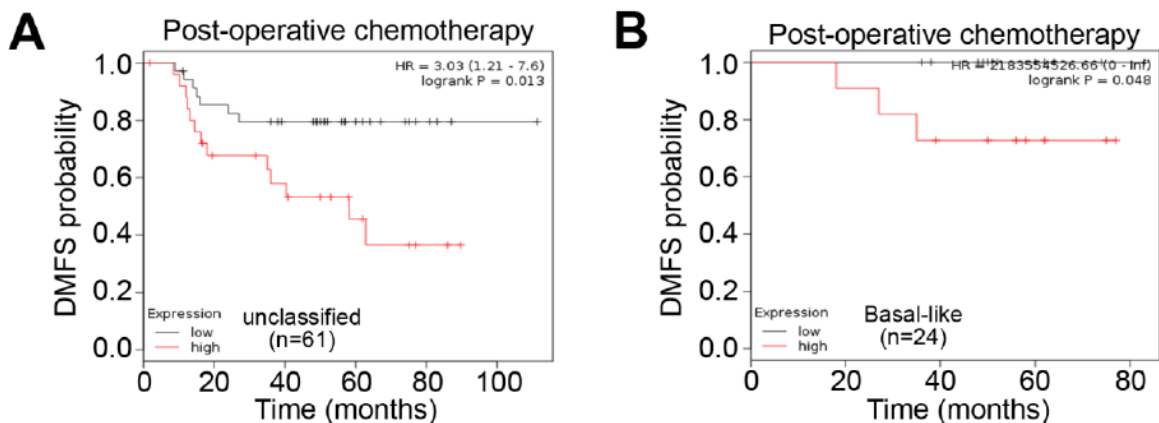

**Supplementary Figure 3: *OTUD7B* upregulation increases the risk for cancer metastasis in breast cancer patients receiving post-operative paclitaxel chemotherapy.** (A, B) K-M analysis of distant metastasis-free survival (DMFS) probability according to *OTUD7B* expression in patients who receive post-operative paclitaxel-based chemotherapy with unclassified (A) or basal-like (B) breast cancer. In (A, B) Kaplan-Meier analyses were performed using the K-M Plotter database and HR denotes hazard ratio.

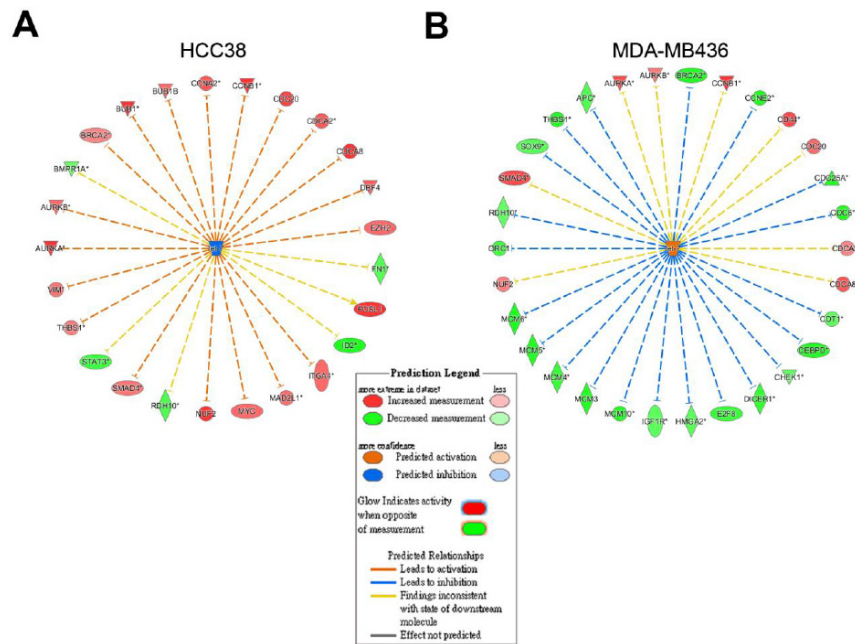

**Supplementary Figure 4: Computational simulation of Let-7 targeting genes in paclitaxel-treated HCC38 and MDA-MB436 cells. (A, B)** Computational simulation of Let-7 microRNA-targeting genes in HCC38 (A) and MDA-MB436 (B) cells following treatment with paclitaxel at  $10 \times IC_{50}$  for 24 hours.
